# Supplementary material
Source: Research Square preprint supplement (doi:10.21203/rs.3.rs-8611017/v1)
Supplement: Supplementary file 1 [file 52cced598299946fc79cdc63.xlsx]

## Sheet: ESM_3(1)
Online Resource 2. Description of spectral and temporal bioacoustic parameters extracted from Scytalopus iraiensis vocalizations using the R package warbleR (Araya-Salas & Smith-Vidaurre, 2017)
Article Title: Vocal conservatism in disjunct populations of the Marsh Tapaculo, Scytalopus iraiensis (Aves: Rhinocryptidae), in the Brazilian Atlantic Forest
Journal: Ornithology Research
Authors: José Alan Sales Souza (1*), Ricardo Henrique Pereira da Silva (1), Bruno Pinho de Lucena (1), Gabriel Rian Alexandre Ferreira (1), Alan Roberto Ferreira Silva (1), Iasmin Duarte da Silva (1), Erich de Freitas Mariano (1)
Affiliation: (1) Laboratório de Pesquisa em Ensino, Zoologia e Conservação, Unidade Acadêmica de Ciências Biológicas, Centro de Saúde e Tecnologia Rural, Universidade Federal de Campina Grande, Santa Cecília, 58708-110, Patos, PB, Brazil.
Corresponding Author: José Alan Sales Souza (alansales21bio@gmail.com)
Parameter	Description
duration	Total duration of the acoustic signal.
meanfreq	Mean frequency of the spectrum; the weighted average of frequency by amplitude (spectral centroid).
sd	Standard deviation of the mean frequency of the spectrum.
freq.median	Median frequency; the frequency at which the spectrum is divided into two frequency intervals of equal energy.
freq.Q25	First quartile frequency; the frequency below which 25% of the spectral energy is found.
freq.Q75	Third quartile frequency; the frequency below which 75% of the spectral energy is found.
freq.IQR	Interquartile frequency range; the bandwidth between the 1st (Q25) and 3rd (Q75) quartiles.
time.median	Time median; the time point at which the signal is divided into two time intervals of equal energy.
time.Q25	First time quartile; the time point at which 25% of the signal's energy has been emitted.
time.Q75	Third time quartile; the time point at which 75% of the signal's energy has been emitted.
time.IQR	Interquartile time range; duration of the interval containing the central 50% of the energy.
peakt	Peak time; the time (relative to the start) at which the maximum absolute amplitude occurs.
skew	Spectral skewness; measures the asymmetry of the spectral energy distribution around the mean.
kurt	Spectral kurtosis; measures the "peakedness" or flatness of the spectral energy distribution.
sp.ent	Spectral entropy; measures the complexity/disorder of the frequency spectrum (0 = pure tone, 1 = white noise).
time.ent	Temporal entropy; measures the complexity/disorder of the energy distribution over the time envelope.
entropy	Spectrographic entropy; the product of spectral entropy and temporal entropy.
sfm	Spectral Flatness Measure; ratio between the geometric mean and arithmetic mean of the spectrum (similarity to white noise).
meandom	Average dominant frequency measured across the acoustic signal.
mindom	Minimum dominant frequency measured in the signal.
maxdom	Maximum dominant frequency measured in the signal.
dfrange	Dominant frequency range (difference between maxdom and mindom).
modindx	Modulation index; cumulative absolute difference between adjacent dominant frequency measurements divided by the dominant frequency range.
startdom	Dominant frequency at the start of the signal.
enddom	Dominant frequency at the end of the signal.
dfslope	Slope of the dominant frequency; rate of change in dominant frequency over time.
meanpeakf	Mean peak frequency; the frequency with the highest amplitude in the mean frequency spectrum.
