# Supplementary material
Source: Research Square preprint supplement (doi:10.21203/rs.3.rs-8611017/v1)
Supplement: Supplementary file 2 [file aba4e45d669f50892908f20f.docx]

################################################################################

**# Online Resource 1 (Supplementary Information (SI))**

# ----------------------------------------------------------------------------------------------------------------------

# Article Title: Vocal conservatism in disjunct populations of the Marsh Tapaculo,

# '*Scytalopus iraiensis*' (Aves: Rhinocryptidae), in the Brazilian

# Atlantic Forest

# Journal: Ornithology Research

# Authors: José Alan Sales Souza (1*), Ricardo Henrique Pereira da Silva (1),

# Bruno Pinho de Lucena (1), Gabriel Rian Alexandre Ferreira (1),

# Alan Roberto Ferreira Silva (1), Iasmin Duarte da Silva (1), Erich de Freitas Mariano (1)

# Affiliation: (1) Laboratório de Pesquisa em Ensino, Zoologia e Conservação,

# Universidade Federal de Campina Grande, Patos, PB, Brazil.

# Contact: alansales21bio@gmail.com

# ----------------------------------------------------------------------------------------------------------------------

# Description: R script providing the complete workflow for bioacoustic parameter

# extraction, data pre-processing, and multivariate statistical

# analyses (PCA, K-means clustering, and PERMANOVA) of *Scytalopus*

#  *iraiensis* vocalizations.

################################################################################

# ======================================================================

# SECTION 1: ENVIRONMENT SETUP

# ======================================================================

# 1.1 Package Installation and Loading

# ----------------------------------------------------------------------------------------------------------------------

# It loads the necessary packages for acoustic and statistical analyses.

packages <- c("tuneR", "warbleR", "seewave", "ggplot2", "parallel",

"vegan", "dplyr", "cluster", "factoextra", "tidyr")

new_packages <- packages[!(packages %in% installed.packages()[,"Package"])]

if(length(new_packages)) install.packages(new_packages)

lapply(packages, require, character.only = TRUE)

# 1.2 Directory Definition

# ----------------------------------------------------------------------------------------------------------------------

# Note: Users must adjust 'work_dir' to their local path containing .wav files.

work_dir <- "/home/josealan/R/my_workspace/scytalopus_iraiensis/songs"

if(dir.exists(work_dir)) {

setwd(work_dir)

cat(paste("Working directory set to:", getwd(), "\n"))

} else {

stop("ERROR: Directory not found. Please check the path.")

}

# ======================================================================

# SECTION 2: DATA PRE-PROCESSING

# ======================================================================

# 2.1 Manual Selection (Smart Loop)

# ----------------------------------------------------------------------------------------------------------------------

# Logic: Checks if 'selection_table.csv' exists. Only analyzes NEW files found.

# This prevents re-analyzing already processed files.

wav_files <- list.files(pattern = "\\.wav$", ignore.case = TRUE)

output_file <- "selection_table.csv"

if (file.exists(output_file)) {

existing_selection <- read.csv(output_file, stringsAsFactors = FALSE)

# Identify files in folder NOT present in the CSV

files_to_analyze <- setdiff(wav_files, existing_selection$sound.files)

# Determine next selection ID

next_selec <- ifelse(nrow(existing_selection) > 0, max(existing_selection$selec, na.rm=TRUE) + 1, 1)

if(length(files_to_analyze) == 0) {

cat("'selection_table.csv' is up to date. Skipping manual selection.\n")

} else {

cat(paste("Found", length(files_to_analyze), "new audio files to analyze.\n"))

}

} else {

files_to_analyze <- wav_files

next_selec <- 1

cat("Starting manual selection from scratch.\n")

}

# Selection Loop (Runs only if there are new files)

if(length(files_to_analyze) > 0) {

cat("\n--- Starting Manual Selection ---\n")

for (file in files_to_analyze) {

cat("\nProcessing:", file, "\n")

song <- try(readWave(file), silent = TRUE)

if (inherits(song, "try-error") || length(song@left) < 512) {

cat(" -> File corrupted or too short. Skipping.\n")

next

}

# Plot spectrogram for visual inspection

try({spectro(song, wl=512, flim=c(0,6), scale=F, norm=T, fastdisp=T)}, silent=TRUE)

cat(" -> CLICK: 1) Start 2) End 3) Max Freq 4) Min Freq (ESC to skip)\n")

coords <- locator(n = 4, type = 'p')

if (is.null(coords) || length(coords$x) < 4) {

cat(" -> Skipped manually.\n")

next

}

# Standardized column names

new_row <- data.frame(selec=next_selec, sound.files=file, n_notes=NA,

start=coords$x[1], end=coords$x[2],

bottom.freq=coords$y[4], top.freq=coords$y[3])

# Append to CSV

write.table(new_row, output_file, sep=",", col.names=!file.exists(output_file),

row.names=FALSE, append=file.exists(output_file))

next_selec <- next_selec + 1

cat(" -> Saved!\n")

}

}

# 2.2 Acoustic Parameter Extraction

# ----------------------------------------------------------------------------------------------------------------------

if (file.exists("selection_table.csv")) {

cat("\n--- Starting Automatic Parameter Extraction ---\n")

sel_table <- read.csv("selection_table.csv", header=TRUE)

# Safety cleaning (Ensure consistent frequency range)

sel_table <- sel_table[sel_table$top.freq > sel_table$bottom.freq, ]

# Standardization Settings

cut_seconds <- 25 # Duration of the analysis window

skip_seconds <- 2 # Offset: Skip the first 2 seconds to avoid initial noise/artifacts

num_cores <- max(1, floor(parallel::detectCores() / 2))

# Adjust start/end times for standardization

for(i in 1:nrow(sel_table)) {

dur <- sel_table$end[i] - sel_table$start[i]

# Check if file is long enough (Must be > cut_seconds + skip_seconds)

if (!is.na(dur) && dur > (cut_seconds + skip_seconds)) {

sel_table$start[i] <- sel_table$start[i] + skip_seconds

sel_table$end[i] <- sel_table$start[i] + cut_seconds

}

}

# Detect available function (warbleR vs seewave compatibility)

spec_func <- if(exists("spectro_analysis")) spectro_analysis else specan

cat(paste("Processing with", num_cores, "cores...\n"))

params <- try(spec_func(X = sel_table, bp = "frange", wl = 512,

threshold = 15, harmonicity = FALSE,

parallel = num_cores, pb = TRUE))

if (!inherits(params, "try-error")) {

write.csv(params, "params.csv", row.names = FALSE)

cat("Parameters extracted and saved to 'params.csv'.\n")

} else {

stop("Extraction Error. Try reducing 'num_cores' to 1.")

}

} else { stop("File 'selection_table.csv' not found. Please run manual selection first.") }

# ======================================================================

# SECTION 3: STATISTICAL ANALYSIS

# ======================================================================

# 3.1 Data Filtering and PCA

# ----------------------------------------------------------------------------------------------------------------------

if (file.exists("params.csv")) {

cat("\n--- Statistical Processing (Filters & PCA) ---\n")

params <- read.csv("params.csv")

# Clean text columns to keep only numeric data

df_num <- params[, !(names(params) %in% c("selec","sound.files","selec.file","duration"))]

df_clean <- na.omit(df_num)

# Filter 1: Remove highly correlated variables (r >= 0.6)

cor_mat <- cor(df_clean)

keep_vars <- names(df_clean)

for(i in 1:(ncol(cor_mat)-1)) {

for(j in (i+1):ncol(cor_mat)) {

if(abs(cor_mat[i,j]) >= 0.6) {

var_remove <- colnames(cor_mat)[j]

if(var_remove %in% keep_vars) keep_vars <- setdiff(keep_vars, var_remove)

}

}

}

df_filt <- df_clean[, keep_vars]

cat(paste("Variables retained after filter (r>0.6):", length(keep_vars), "\n"))

# Filter 2: Normalization (Log transformation if non-normal)

for(col in names(df_filt)) {

val <- df_filt[[col]]

if(is.numeric(val) && min(val) >= 0 && sd(val) > 0) {

shapiro <- try(shapiro.test(val), silent=TRUE)

# Apply log10 if p-value < 0.001 (significantly non-normal)

if(!inherits(shapiro, "try-error") && shapiro$p.value < 0.001) {

df_filt[[col]] <- log10(val + 1e-6)

}

}

}

# PCA Calculation

df_filt <- df_filt[, apply(df_filt, 2, var) > 0]

pca <- prcomp(df_filt, scale. = TRUE)

# Select axes explaining at least 95% variance

cum_var <- summary(pca)$importance[3, ]

idx_cut <- which(cum_var >= 0.95)[1]

scores_95 <- as.data.frame(pca$x[, 1:idx_cut])

scores_95$sound.files <- params$sound.files[as.numeric(rownames(df_filt))]

# Save PCA Results

write.csv(scores_95, "pca_scores_95var.csv", row.names = FALSE)

write.csv(as.data.frame(pca$rotation), "RESULT_1_Loadings_PCA.csv")

cat(paste("PCA generated (", idx_cut, " axes explain 95% variance).\n", sep=""))

}

# 3.2 Cluster Analysis (K-means)

# ----------------------------------------------------------------------------------------------------------------------

if (exists("scores_95")) {

cat("\n--- Cluster Analysis (Unsupervised K-means) ---\n")

data_cluster <- scores_95[, 1:idx_cut]

# Determine Optimal K (Silhouette method)

# Note: The plot is generated but not saved as a main figure in this script

g_sil <- fviz_nbclust(data_cluster, kmeans, method = "silhouette") +

labs(title = "Optimal Number of Clusters")

print(g_sil)

# K-means clustering (K=2)

set.seed(123)

km_res <- kmeans(data_cluster, centers = 2, nstart = 25)

scores_95$Cluster <- as.factor(km_res$cluster)

# Save classification results

write.csv(scores_95, "RESULT_3_File_Classification.csv", row.names=FALSE)

cat("Clusters identified and saved.\n")

}

# 3.3 Geographic Hypothesis Test (PERMANOVA)

# ----------------------------------------------------------------------------------------------------------------------

if (file.exists("pca_scores_95var.csv") & file.exists("macroregion.csv")) {

cat("\n--- Geographic Hypothesis Test (PERMANOVA) ---\n")

# Load Data

scores_pca <- read.csv("pca_scores_95var.csv", stringsAsFactors = FALSE)

meta_geo <- read.csv("macroregion.csv", stringsAsFactors = FALSE)

# ID Recovery: Ensures sound.files column exists

if(!"sound.files" %in% names(scores_pca)) {

if(file.exists("params.csv")) {

cat("Recovering IDs from 'params.csv'...\n")

params_temp <- read.csv("params.csv", stringsAsFactors = FALSE)

scores_pca$sound.files <- params_temp$sound.files[1:nrow(scores_pca)]

} else {

stop("CRITICAL ERROR: Cannot find sound filenames.")

}

}

# ID Matching (Regex extracting numbers)

scores_pca$MatchID <- base::gsub("[^0-9]", "", as.character(scores_pca$sound.files))

meta_geo$MatchID <- base::gsub("[^0-9]", "", as.character(meta_geo$ID))

# Merge Acoustic and Geographic Data

data_geo <- merge(scores_pca, meta_geo, by = "MatchID")

# Run Statistics (if enough data matches)

if(nrow(data_geo) > 5) {

cat(paste("Files matched with regions:", nrow(data_geo), "\n"))

# PERMANOVA

pc_cols <- grep("^PC", names(data_geo))

dist_mat <- vegdist(data_geo[, pc_cols], method = "euclidean")

set.seed(123)

permanova <- adonis2(dist_mat ~ Region, data = data_geo, permutations = 9999)

print(permanova)

# BETADISPER (Homogeneity of multivariate dispersions)

beta <- betadisper(dist_mat, data_geo$Region)

cat("\nDispersion Test (Betadisper):\n")

print(anova(beta))

} else {

cat("ERROR IN MERGING: Too few files matched (< 5). Check IDs.\n")

}

} else {

cat("\nPERMANOVA skipped: Required files not found.\n")

}
