# Supplementary material
Source: Research Square preprint supplement (doi:10.21203/rs.3.rs-8611017/v1)
Supplement: Supplementary file 3 [file bf713bda4d2429734619ef98.xlsx]

## Sheet: ESM_1(1)
Online Resource 3. Metadata of Scytalopus iraiensis sound recordings analyzed in this study, including source databases, quality ratings, and geographic coordinates
Article Title: Vocal conservatism in disjunct populations of the Marsh Tapaculo, Scytalopus iraiensis (Aves: Rhinocryptidae), in the Brazilian Atlantic Forest
Journal: Ornithology Research
Authors: José Alan Sales Souza (1*), Ricardo Henrique Pereira da Silva (1), Bruno Pinho de Lucena (1), Gabriel Rian Alexandre Ferreira (1), Alan Roberto Ferreira Silva (1), Iasmin Duarte da Silva (1), Erich de Freitas Mariano (1)
Affiliation: (1) Laboratório de Pesquisa em Ensino, Zoologia e Conservação, Unidade Acadêmica de Ciências Biológicas, Centro de Saúde e Tecnologia Rural, Universidade Federal de Campina Grande, Santa Cecília, 58708-110, Patos, PB, Brazil.
Corresponding Author: José Alan Sales Souza (alansales21bio@gmail.com)
Database	Quality Rating	Recording ID	Download Date	Location (City and State)	Macroregion of Brazil	Geographic Coordinates
Wiki Aves	A	WA1219545	July 21, 2024	Resende Costa, Minas Gerais	Southeast	-20.921944, -44.237778
Wiki Aves	A	WA1285975	July 21, 2024	Resende Costa, Minas Gerais	Southeast	-20.921944, -44.237778
Wiki Aves	A	WA2764317	July 21, 2024	Ouro Preto, Minas Gerais	Southeast	-20.385556, -43.508056
Wiki Aves	B	WA1683413	July 21, 2024	Rio Piracicaba, Minas Gerais	Southeast	-19.928889, -43.173889
Wiki Aves	B	WA2852150	July 21, 2024	Santa Bárbara, Minas Gerais	Southeast	-19.958889, -43.415
Wiki Aves	C	WA2742744	July 21, 2024	Ouro Preto, Minas Gerais	Southeast	-20.385556, -43.508056
Xeno-canto	A	XC189521	July 21, 2024	Catas Altas, Minas Gerais	Southeast	-20.11, -43.491
Xeno-canto	A	XC229504	July 21, 2024	Curitiba, Paraná	South	-25.5, -49.0833333333
Xeno-canto	A	XC229507	July 21, 2024	Curitiba, Paraná	South	-25.5, -49.0833333333
Xeno-canto	A	XC427938	July 21, 2024	São José dos Pinhais, Paraná	South	-25.574167, -49.028361
Xeno-canto	A	XC556577	July 21, 2024	Conceição do Mato Dentro, Minas Gerais	Southeast	-19.21942, -43.49666
Xeno-canto	B	XC76250	July 21, 2024	Morro do Pilar, Minas Gerais	Southeast	-19.185, -43.394
Wiki Aves	A	WA1150845	August 12, 2025	Itabira, Minas Gerais	Southeast	-19.618889, -43.226944
Wiki Aves	A	WA1192469	August 12, 2025	Morro do Pilar, Minas Gerais	Southeast	-19.2198931, -43.4965827
Wiki Aves	A	WA1392892	August 12, 2025	Bom Jesus, Rio Grande do Sul	South	-28.667778, -50.416944
Wiki Aves	A	WA2220174	August 12, 2025	Curitibanos, Santa Catarina	South	-27.282778, -50.583889
Wiki Aves	A	WA2274687	August 12, 2025	Barbacena, Minas Gerais	Southeast	-21.225833, -43.773889
Wiki Aves	A	WA2409367	August 12, 2025	Itabira, Minas Gerais	Southeast	-19.618889, -43.226944
Wiki Aves	A	WA2955010	August 12, 2025	Santana do Riacho, Minas Gerais	Southeast	-19.168889, -43.713889
Wiki Aves	A	WA2984108	August 12, 2025	Piraquara, Paraná	South	-25.5, -49.083
Wiki Aves	A	WA3322328	August 12, 2025	Três Barras, Santa Catarina	South	-26.105833, -50.321944
Wiki Aves	A	WA3753183	August 12, 2025	Teixeira Soares, Paraná	South	-25.367778, -50.460833
Wiki Aves	A	WA4016273	August 12, 2025	Bom Jesus, Rio Grande do Sul	South	-28.667778, -50.416944
Wiki Aves	A	WA4268182	August 12, 2025	General Carneiro, Paraná	South	-26.427778, -51.315833
Wiki Aves	A	WA4284781	August 12, 2025	Três Barras, Santa Catarina	South	-26.105833, -50.321944
Wiki Aves	A	WA5036048	August 12, 2025	São Mateus do Sul, Paraná	South	-25.873889, -50.382778
Wiki Aves	A	WA5094723	August 12, 2025	Palmas, Paraná	South	-26.4878703, -51.9906334
Wiki Aves	A	WA5305753	August 12, 2025	Bom Jesus, Rio Grande do Sul	South	-28.667778, -50.416944
Wiki Aves	A	WA5795231	August 12, 2025	Antônio Carlos, Minas Gerais	Southeast	-21.317780, -43.746940
Wiki Aves	A	WA5866835	August 12, 2025	São José dos Pinhais, Paraná	South	-25.535000, -49.205833
Wiki Aves	A	WA5901921	August 12, 2025	Morro do Pilar, Minas Gerais	Southeast	-19.2198931, -43.4965827
Wiki Aves	A	WA607585	August 12, 2025	São José dos Pinhais, Paraná	South	-25.535000, -49.205833
Wiki Aves	A	WA6631163	August 12, 2025	Major Vieira, Santa Catarina	South	-26.367778, -50.327778
Wiki Aves	A	WA855335	August 12, 2025	Rio Grande, Rio Grande do Sul	South	-32.035000, -52.098889
Wiki Aves	A	WA974395	August 12, 2025	São José dos Pinhais, Paraná	South	-25.535000, -49.205833
Wiki Aves	B	WA1406061	August 12, 2025	Senhora de Oliveira, Minas Gerais	Southeast	-20.793889, -43.343889
Wiki Aves	B	WA1516658	August 12, 2025	Bom Jesus, Rio Grande do Sul	South	-28.667778, -50.416944
Wiki Aves	B	WA181812	August 12, 2025	Campo Belo do Sul, Santa Catarina	South	-27.898889, -50.760833
Wiki Aves	B	WA2662163	August 12, 2025	Santa Bárbara, Minas Gerais	Southeast	-19.958889, -43.415000
Wiki Aves	B	WA3117364	August 12, 2025	Piraquara, Paraná	South	-25.5, -49.083
Wiki Aves	B	WA3854456	August 12, 2025	São José dos Pinhais, Paraná	South	-25.535000, -49.205833
Wiki Aves	B	WA3989007	August 12, 2025	Santa Bárbara, Minas Gerais	Southeast	-19.958889, -43.415000
Wiki Aves	B	WA487684	August 12, 2025	Mariana, Minas Gerais	Southeast	-20.377778, -43.415833
Wiki Aves	B	WA6046627	August 12, 2025	Teixeira Soares, Paraná	South	-25.367778, -50.460833
Wiki Aves	B	WA607588	August 12, 2025	São José dos Pinhais, Paraná	South	-25.535000, -49.205833
Wiki Aves	B	WA740405	August 12, 2025	Campo Belo do Sul, Santa Catarina	South	-27.898889, -50.760833
Wiki Aves	B	WA849986	August 12, 2025	Campo Belo do Sul, Santa Catarina	South	-27.898889, -50.760833
Wiki Aves	B	WA935410	August 12, 2025	Ouro Preto, Minas Gerais	Southeast	-20.385556, -43.508056
Wiki Aves	C	WA1873612	August 12, 2025	Itaverava, Minas Gerais	Southeast	-20.677778, -43.610000
Wiki Aves	C	WA2110243	August 12, 2025	Morro do Pilar, Minas Gerais	Southeast	-19.2198931, -43.4965827
Wiki Aves	C	WA2852269	August 12, 2025	São Jose dos Pinhais, Paraná	South	-25.535000, -49.205833
Wiki Aves	C	WA3083105	August 12, 2025	Ouro Preto, Minas Gerais	Southeast	-20.385556, -43.508056
Wiki Aves	C	WA3211632	August 12, 2025	Morro do Pilar, Minas Gerais	Southeast	-19.2198931, -43.4965827
Wiki Aves	C	WA44371	August 12, 2025	Rio Grande, Rio Grande do Sul	South	-32.035000, -52.098889
Wiki Aves	C	WA4583067	August 12, 2025	Morro do Pilar, Minas Gerais	Southeast	-19.2198931, -43.4965827
Wiki Aves	C	WA601765	August 12, 2025	Ouro Preto, Minas Gerais	Southeast	-20.385556, -43.508056
Wiki Aves	C	WA6254310	August 12, 2025	Palmas, Paraná	South	-26.4878703, -51.9906334
Wiki Aves	C	WA660031	August 12, 2025	Ouro Preto, Minas Gerais	Southeast	-20.385556, -43.508056
Macaulay Library	A	178183	August 6, 2025	Bom Jesus, Rio Grande do Sul	South	-28.667778, -50.416944
Macaulay Library	A	178184	August 6, 2025	Bom Jesus, Rio Grande do Sul	South	-28.667778, -50.416944
Macaulay Library	A	294219	August 6, 2025	Piraquara, Paraná	South	-25.5, -49.083
Macaulay Library	A	131339651	August 6, 2025	Morro do Pilar, Minas Gerais	Southeast	-19.220698, -43.49519
Macaulay Library	A	222119361	August 6, 2025	Teixeira Soares, Paraná	South	-25.325259, -50.541796
Macaulay Library	A	330570081	August 6, 2025	Três Barras, Santa Catarina	South	-26.220086, -50.3055678
Macaulay Library	A	618119405	August 6, 2025	Teixeira Soares, Paraná	South	-25.362764, -50.508091
Macaulay Library	A	638234381	August 6, 2025	São José dos Pinhais, Paraná	South	-25.5662187, -49.0584746
Macaulay Library	B	424083281	August 6, 2025	Senhora de Oliveira, Minas Gerais	Southeast	-20.7937366, -43.3418979
Macaulay Library	B	488525521	August 6, 2025	Três Barras, Santa Catarina	South	-26.220086, -50.3055678
Macaulay Library	C	199152	August 6, 2025	Piraí do Sul, Paraná	South	-24.523722, -49.794271
Macaulay Library	C	294216	August 6, 2025	Piraquara, Paraná	South	-25.5, -49.083
Macaulay Library	C	135279931	August 6, 2025	São José dos Pinhais, Paraná	South	-25.5662187, -49.0584746
Macaulay Library	C	360419221	August 6, 2025	Rio Negrinho, Santa Catarina	South	-26.617437, -49.64187
Macaulay Library	C	385084351	August 6, 2025	Morro do Pilar, Minas Gerais	Southeast	-19.2198931, -43.4965827
Macaulay Library	C	608595456	August 6, 2025	Cambará do Sul, Rio Grande do Sul	South	-29.1661473, -50.097284
Macaulay Library	C	622209211	August 6, 2025	Palmas, Paraná	South	-26.5368964, -51.6069567
Macaulay Library	C	622584952	August 6, 2025	São Mateus do Sul, Paraná	South	-26.023366, -50.634477
Macaulay Library	C	624059084	August 6, 2025	Pinhais, Rio Grande do Sul	South	-25.4403877, -49.1426919
Xeno-canto	A	XC229506	August 6, 2025	Curitiba, Paraná	South	-25.5, -49.0833333333
Xeno-canto	B	XC174660	August 6, 2025	Campo Belo do Sul, Santa Catarina	South	-28.0068, -50.8742
Xeno-canto	C	XC114451	August 6, 2025	São José dos Pinhais, Paraná	South	-25.5709, -49.0573
